# Supplementary material for: Heterogeneous catalysts based on built-in N-heterocyclic carbenes with high removability, recoverability and reusability for ring-opening polymerization of cyclic esters
Source: Royal Society of Chemistry journal article supplement (doi:10.1039/c9py00111e), 2019-01-01
Supplement: c9py00111e1.pdf [file c9py00111e1.pdf]

## Electronic Supplementary Information

# Heterogeneous Catalyst Based on Built-in N-Heterocyclic Carbenes with High Removability, Recoverability and Reusability for Ring-opening Polymerization of Cyclic Esters

*Wen Liu, Guo-Qiang Tian, Dan-Dan Yang, Gang Wu, Si-Chong Chen,\* Yu-Zhong Wang\**

National Engineering Laboratory of Eco-Friendly Polymeric Materials (Sichuan), State Key Laboratory of Polymer Materials Engineering, College of Chemistry, Sichuan University, Chengdu, 610064, China.

\*Corresponding Author: [chensichong@scu.edu.cn](mailto:chensichong@scu.edu.cn) (S. C. Chen) and [yzwang@scu.edu.cn](mailto:yzwang@scu.edu.cn) (Y.

Z.

Wang)

### Diameter distribution of PS-CH<sub>2</sub>Cl and PS-PrIm<sup>+</sup>Cl<sup>-</sup> microsphere

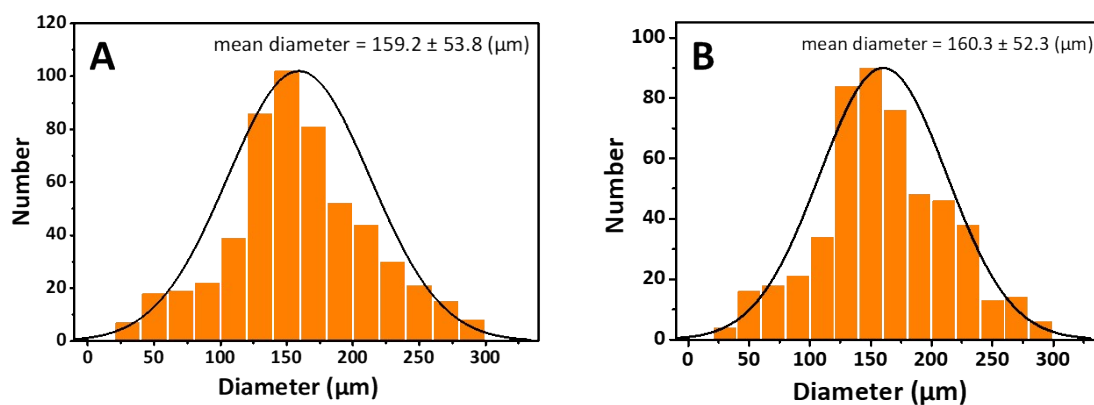

**Fig. S1** Diameter distribution of PS-CH<sub>2</sub>Cl and PS-PrIm<sup>+</sup>Cl<sup>-</sup> microsphere. (The number of microspheres exceeds 500).

### The separation of catalyst and product by filtration

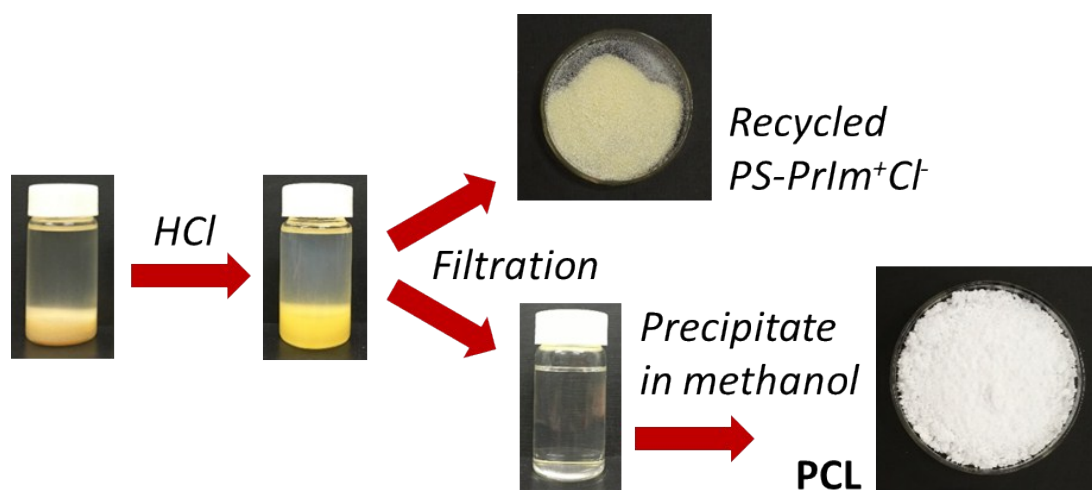

**Fig. S2.** The purification of ROP products and recycling of the catalysts.

## The whiteness of samples

**Table S1.** The whiteness of PCL prepared with different catalysts

| catalyst                   | termination agent | L* <sup>a</sup> | a* <sup>b</sup> | b* <sup>c</sup> | R457 <sup>d</sup> |
|----------------------------|-------------------|-----------------|-----------------|-----------------|-------------------|
| NHCs                       | HCl               | 96.09           | -0.46           | 2.41            | 87.44             |
| NHCs                       | H <sub>2</sub> O  | 97.45           | -0.36           | 1.57            | 91.22             |
| NHCs                       | CHCl <sub>3</sub> | 94.49           | -1.45           | 10.1            | 75.39             |
| PS-NHCs                    | HCl               | 98.01           | -0.07           | 0.57            | 94.15             |
| Sn(Oct) <sub>2</sub>       | --                | 97.83           | -0.53           | 1.26            | 93.22             |
| Commercial PCL (DG-COH150) |                   | 93.85           | -0.1            | 0.61            | 81.90             |

<sup>a</sup> The brightness of the sample.

<sup>b</sup> The red and green phase of the samples.

<sup>c</sup> The yellow and blue phase of the samples.

<sup>d</sup> The whiteness of samples.

**Thermal stability of microspheres**

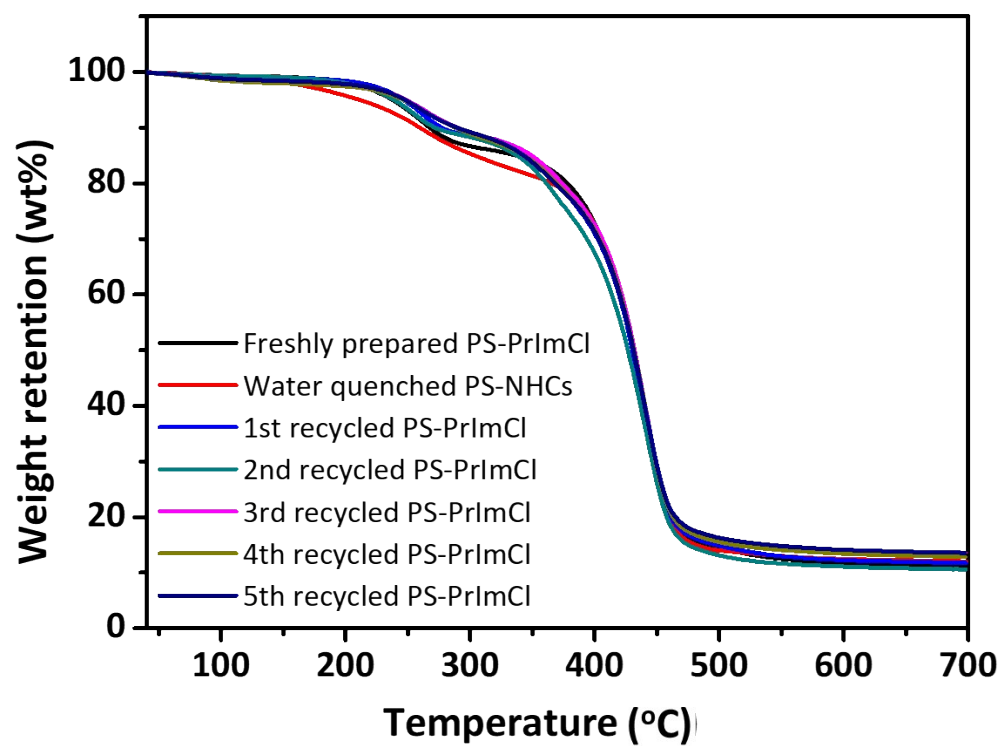

**Fig. S3.** The TG curves of microspheres.

### N<sub>2</sub> sorption isotherms of recycled PS-PrIm<sup>+</sup>Cl<sup>-</sup> microsphere

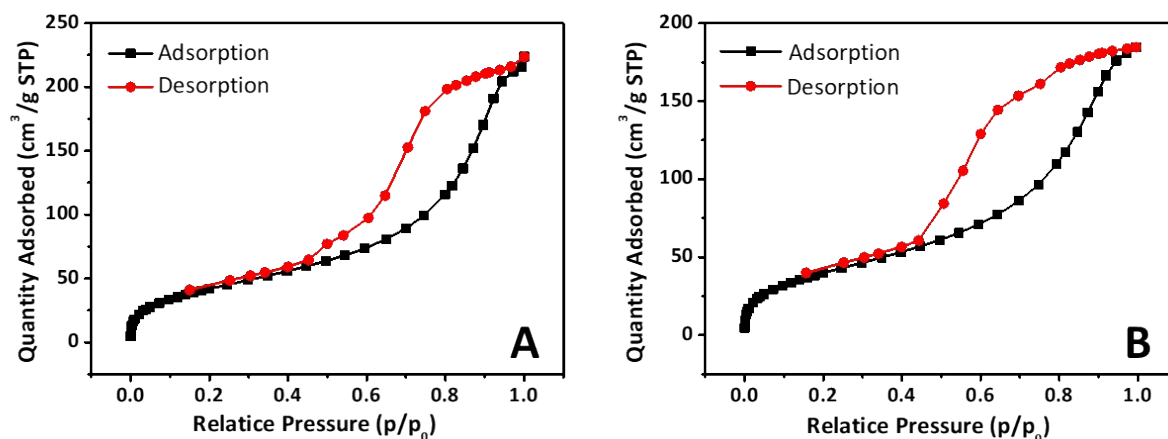

**Fig. S4.** N<sub>2</sub> sorption isotherms of 1st (A) and 5th (B) recycled PS-PrIm<sup>+</sup>Cl<sup>-</sup> microspheres

**Table S2** Textural parameters of 1st and 5th recycled PS-PrIm<sup>+</sup>Cl<sup>-</sup> microspheres with

HCl

| Sample                                            | S <sup>a</sup> /m <sup>2</sup> g <sup>-1</sup> | V <sup>b</sup> /cm <sup>3</sup> g <sup>-1</sup> | Pore size <sup>c</sup> /nm |
|---------------------------------------------------|------------------------------------------------|-------------------------------------------------|----------------------------|
| 1st recycled PS-PrIm <sup>+</sup> Cl <sup>-</sup> | 155                                            | 0.33                                            | 5.89                       |
| 5th recycled PS-PrIm <sup>+</sup> Cl <sup>-</sup> | 149                                            | 0.29                                            | 4.83                       |

<sup>a</sup> Surface area calculated from the nitrogen adsorption isotherm using the BET method.

<sup>b</sup> Single point pore volume calculated at relative pressure  $P/P_0$  of 0.99.

<sup>c</sup> BJH method from desorption branch.
